# Erratum: “Four-Wire Bridge Measurements of Silicon van der Pauw Stress Sensors” [ASME J. Electron. Packag., 2014, 136(4), p. 041014; DOI: [10.1115/1.4028333](https://doi.org/10.1115/1.4028333)]

Richard C. Jaeger, Mohammad Motalab, Safina Hussain, and Jeffrey C. Suhling

---

Unfortunately, the desired output should actually be the negative of our original choice for  $V_O$  in Fig. 1. Thus, a sign error also appears in Eqs. (13) and (14) and of the text. The desired outputs are:

$$V_{\text{VDP}}^{0^\circ} - V_{\text{VDP}}^{90^\circ} = V_{\text{VDP}}[3.16\pi_{44}(\sigma'_{11} - \sigma'_{22})] \quad (13)$$

$$V_{\text{VDP}}^{+45^\circ} - V_{\text{VDP}}^{-45^\circ} = V_{\text{VDP}}[3.16(2\pi_D)\sigma'_{12}] \quad (14)$$

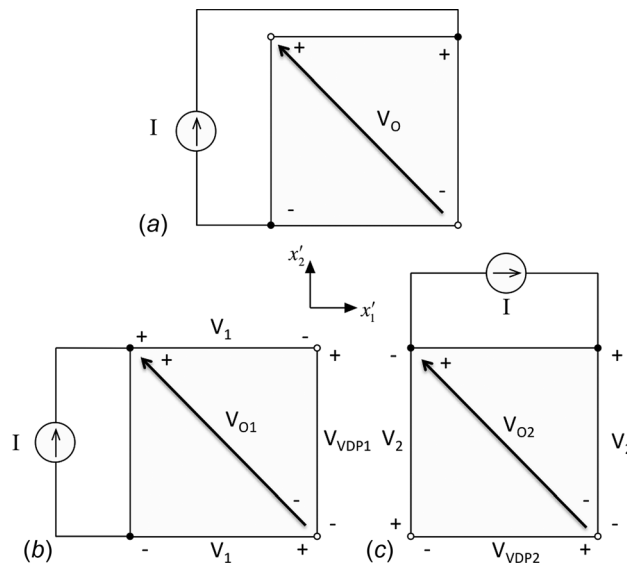

**Fig. 1** Analysis by superposition: (a) diagonal current excitation; (b) and (c) equivalent circuits for superposition
